# Supplementary material for: A de novo missense mutation in MPP2 confers an increased risk of Vogt–Koyanagi–Harada disease as shown by trio-based whole-exome sequencing
Source: PubMed Central journal article supplement (PMC10616125; doi:10.1038/s41423-023-01088-9), 2023-10-12

**Fig. 1**

MPP2

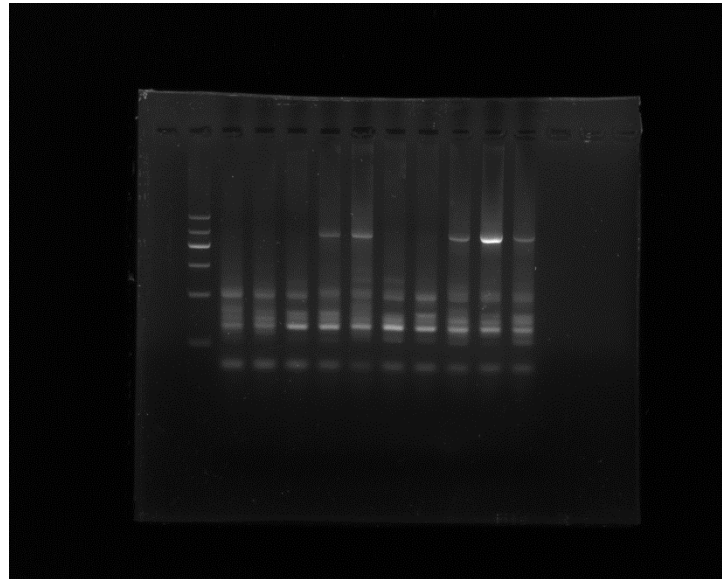

$\beta$ -actin

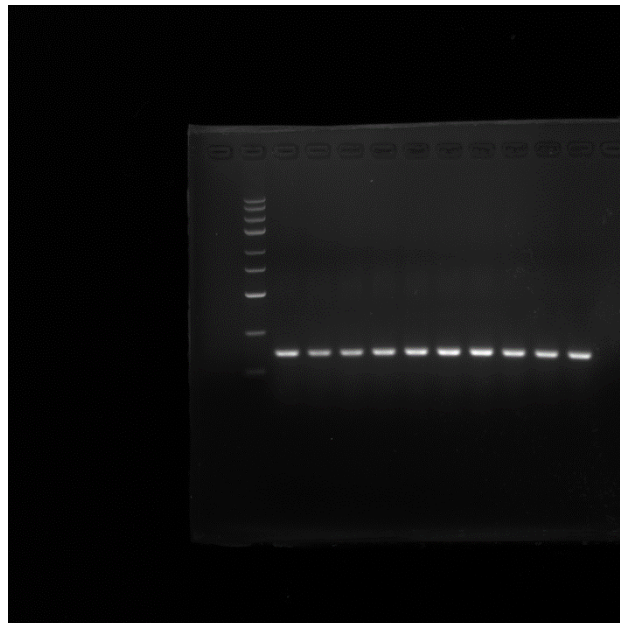

**Fig. 3**

**a**

MPP2

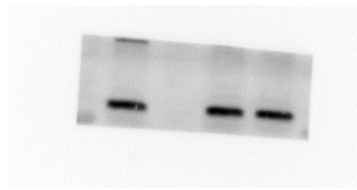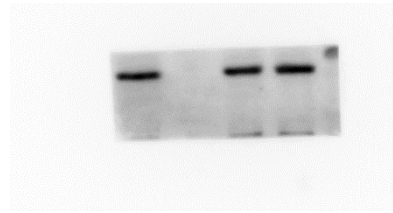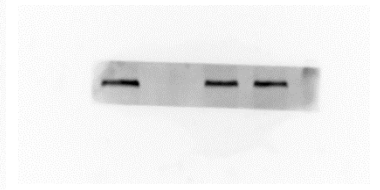

GAPDH

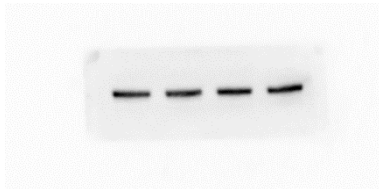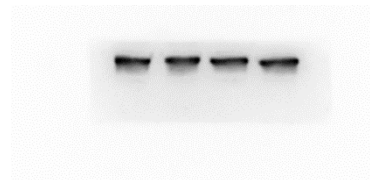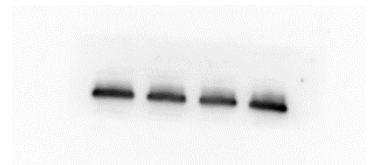

**k**

ZO-1

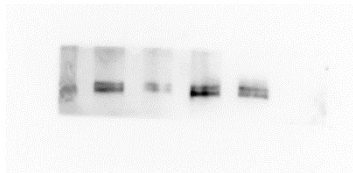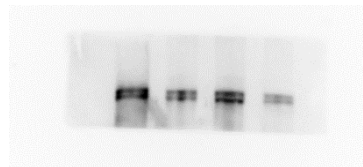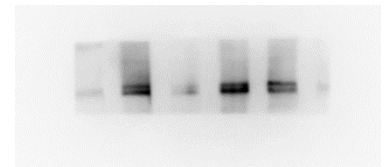

GAPDH

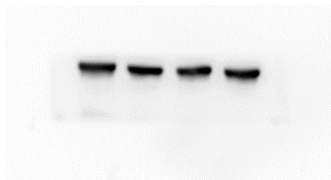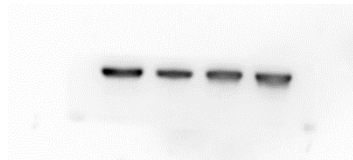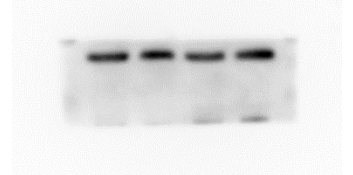

**Fig. 4**

**e**

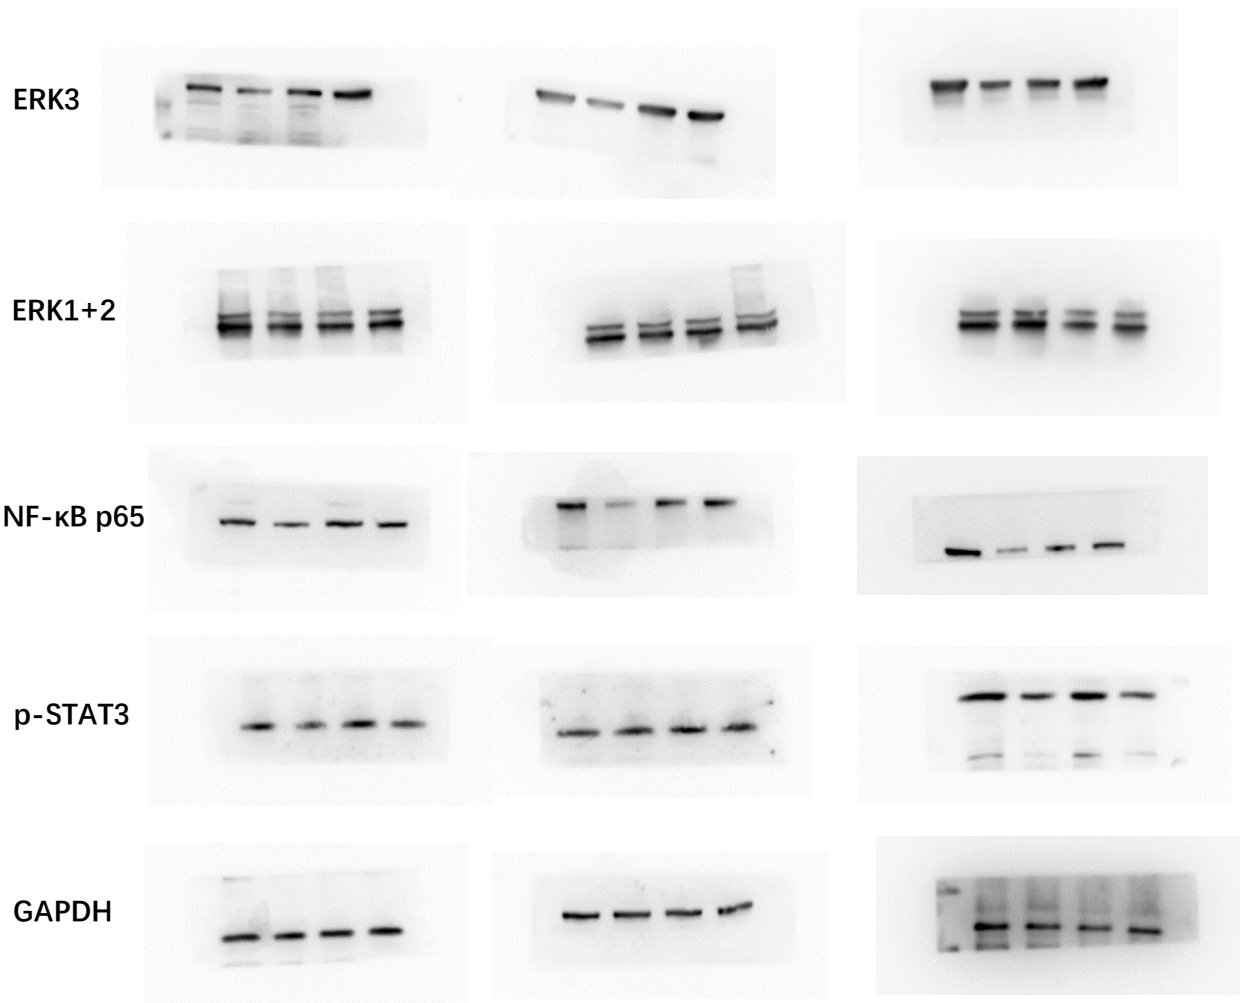

**g**

**ERK3**

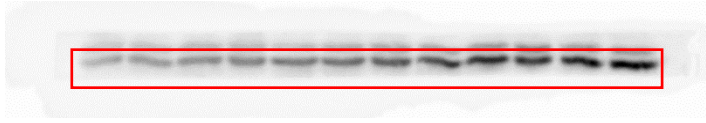

**ERK1+2**

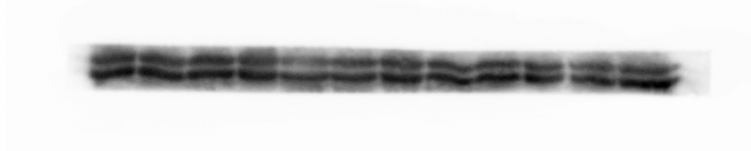

**NF-κB p65**

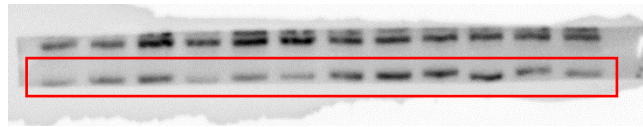

**p-STAT3**

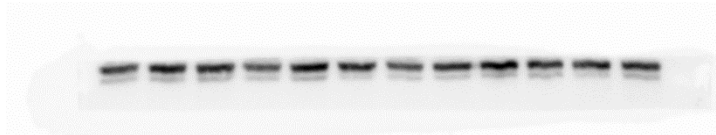

**GAPDH**

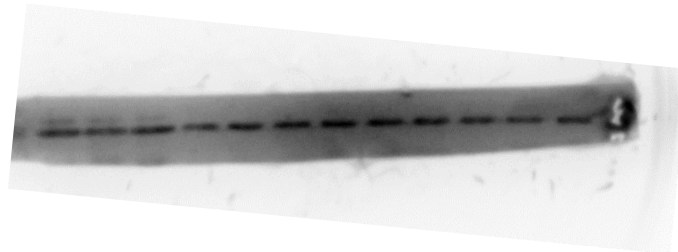

**h**

**ERK3**

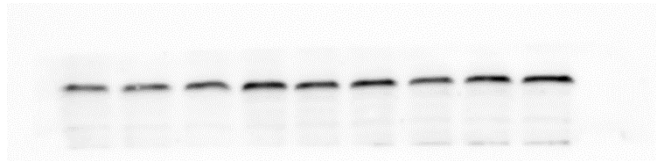

**ERK1+2**

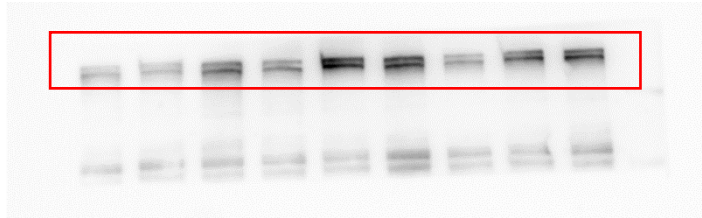

**NF- $\kappa$ B p65**

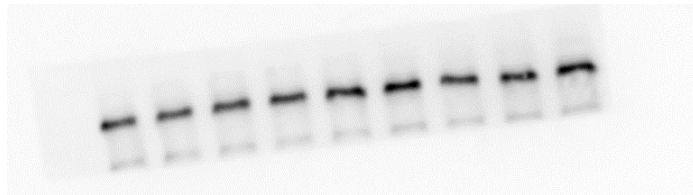

**p-STAT3**

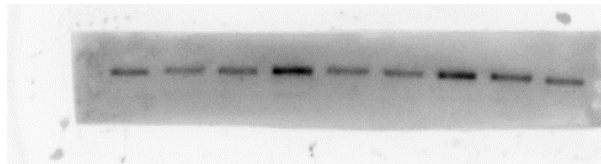

**GAPDH**

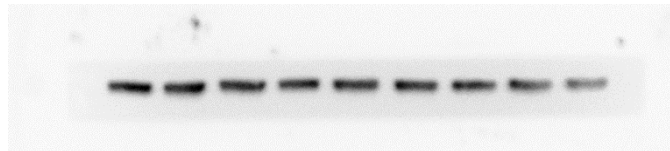

Fig. 5

d

MPP2-K315

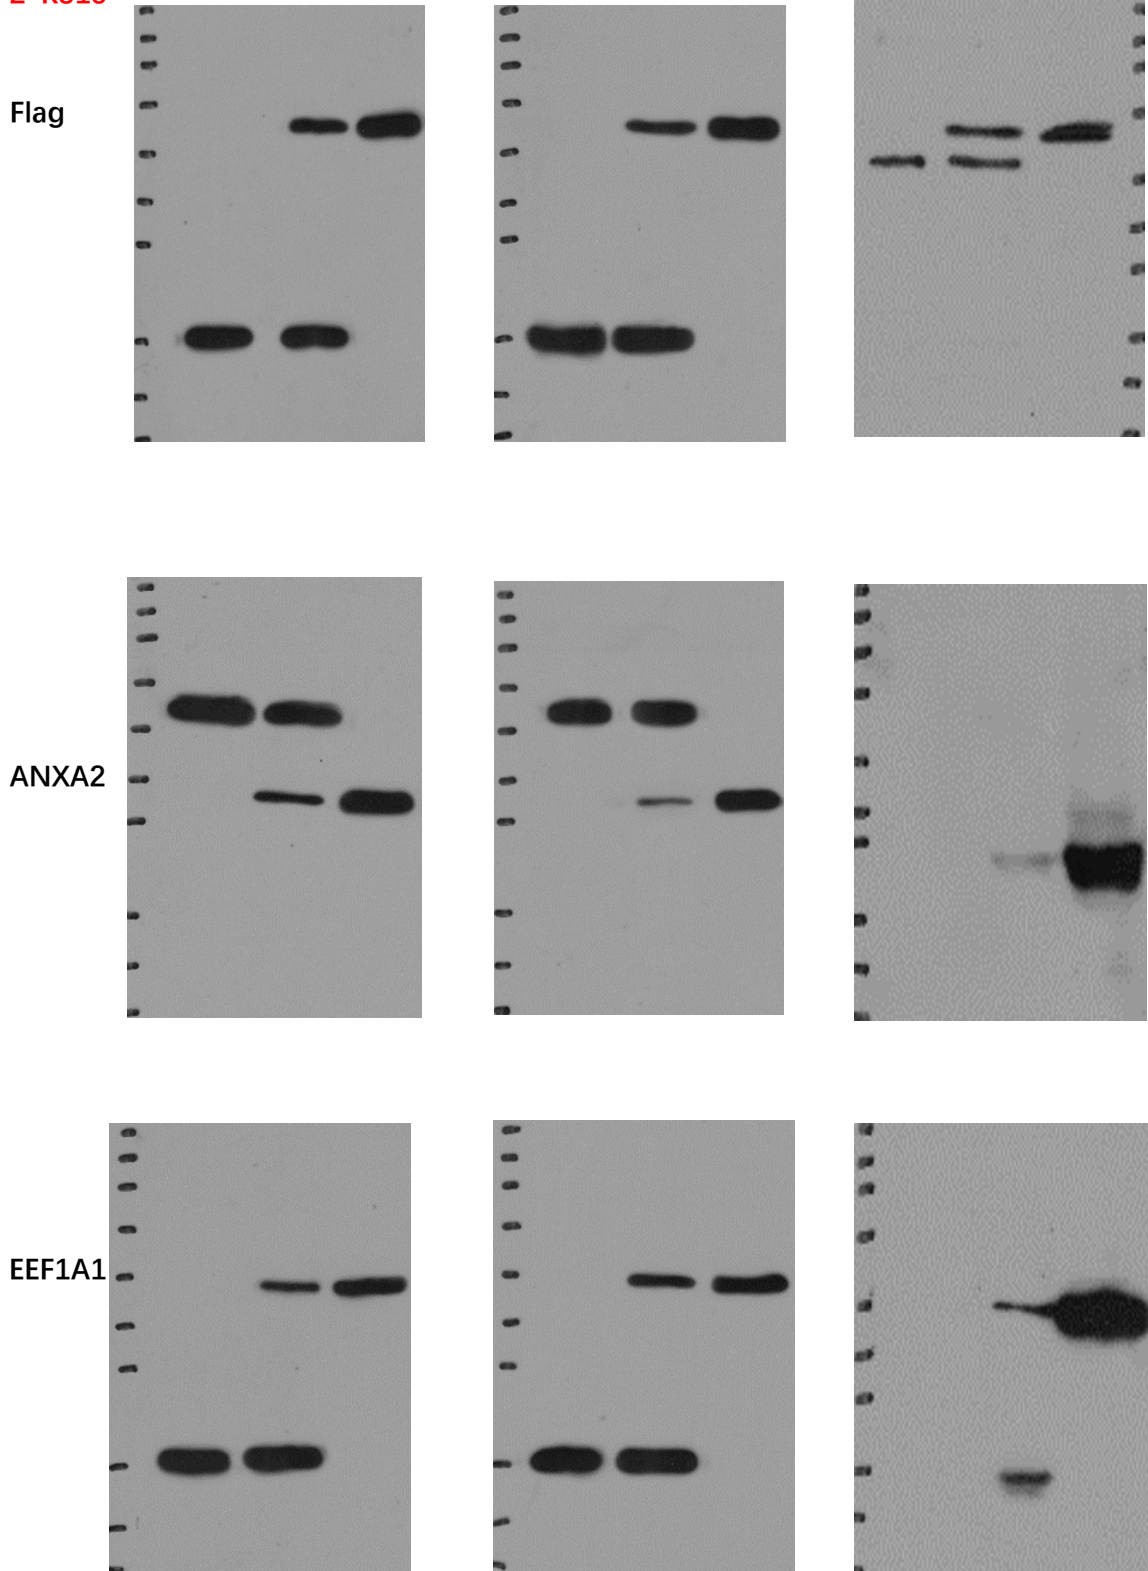

MPP2-N315

Flag

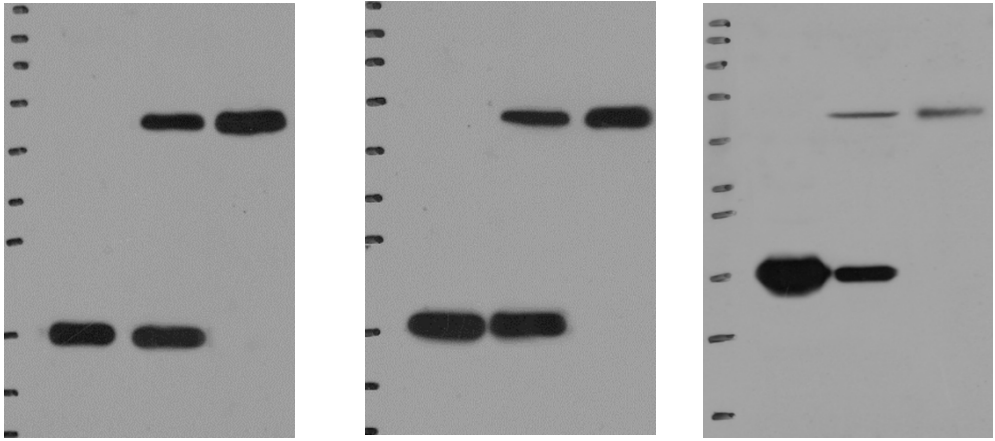

ANXA2

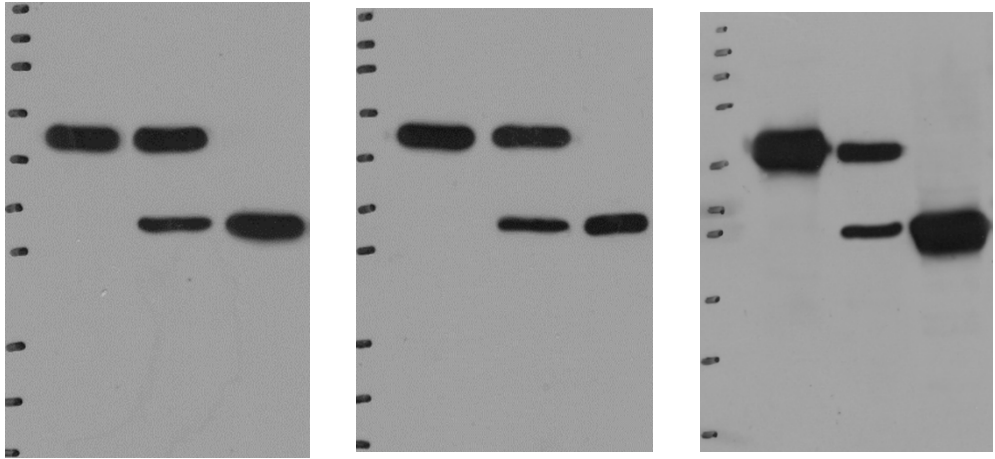

EEF1A1

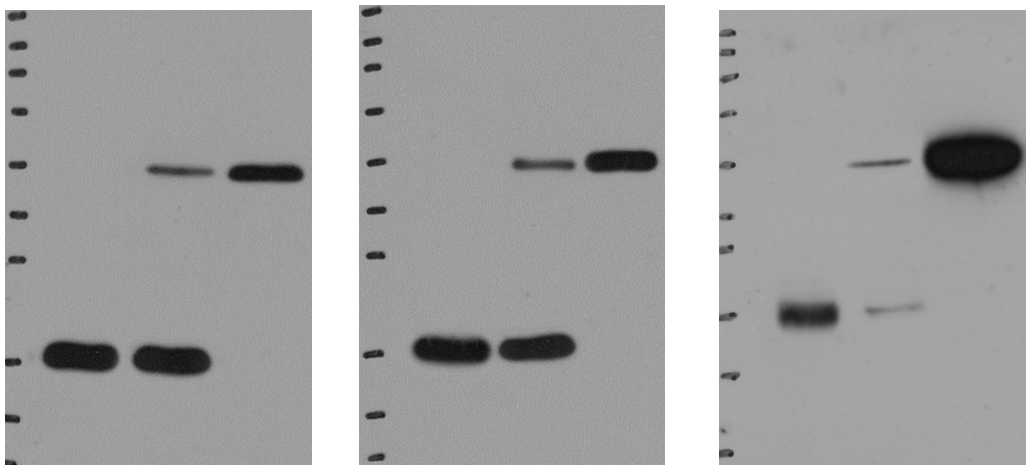

f

ANXA2

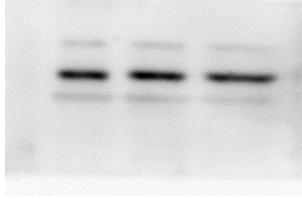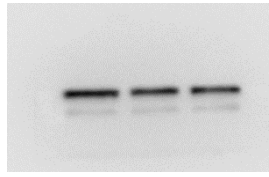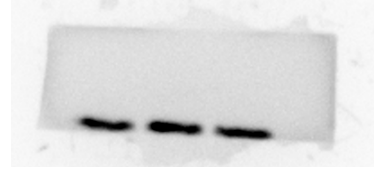

GAPDH

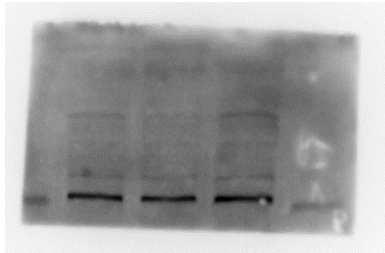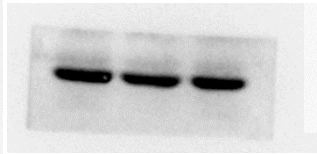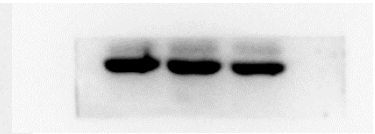



**Fig 6**

**a**

ERK3

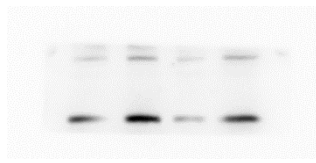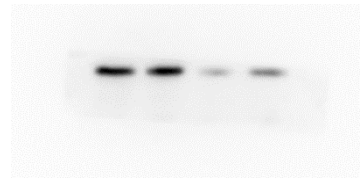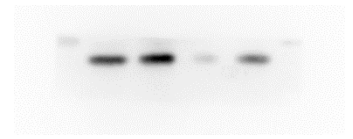

GAPDH

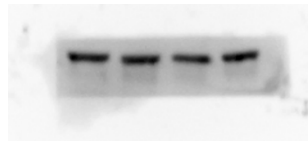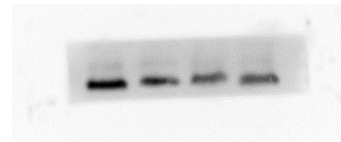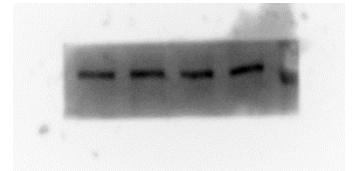

**b**

ERK3

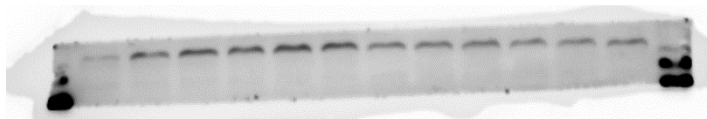

GAPDH

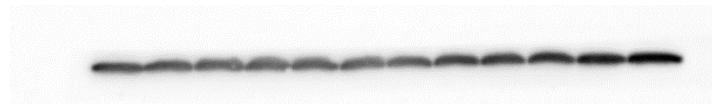

## Supplementary Fig. 2

d

EGFP

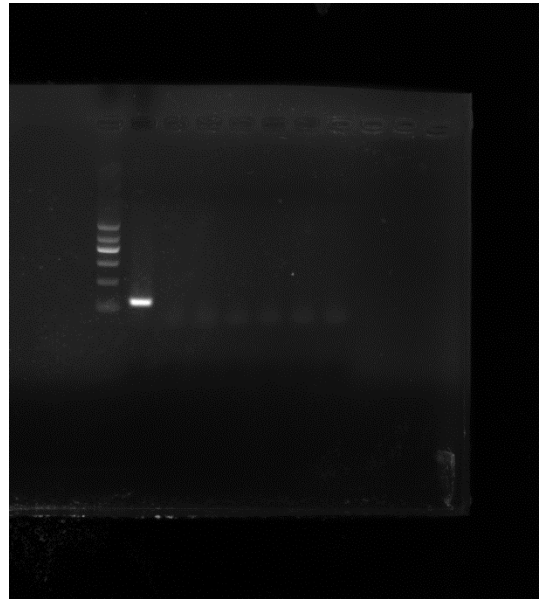

GAPDH

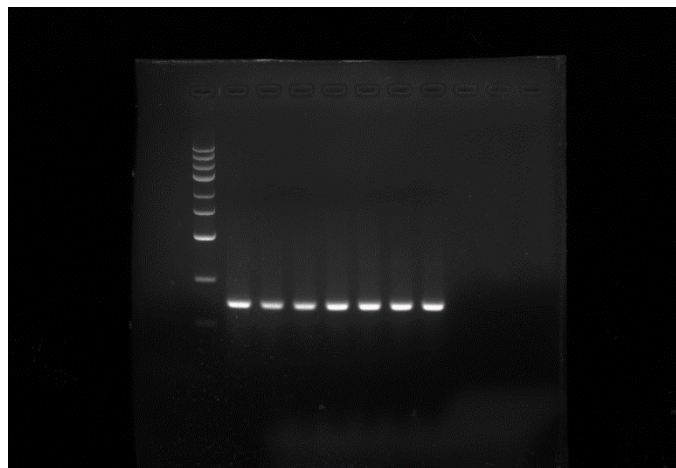

O

MPP2

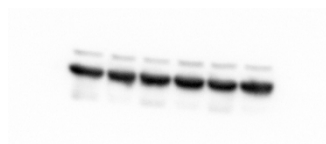

GAPDH

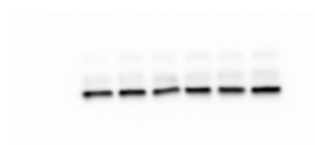

Supplement: 41423_2023_1088_MOESM2_ESM.pdf [file 41423_2023_1088_MOESM2_ESM.pdf]
